# Supplementary material for: Mortality risk factors of COVID-19 infection in kidney transplantation recipients: a systematic review and meta-analysis of cohorts and clinical registries
Source: PubMed Central journal article supplement (PMC8501014; doi:10.1038/s41598-021-99713-y), 2021-10-08

# **Mortality Risk Factors of COVID-19 Infection in Kidney Transplantation Recipients: A Systematic Review and Meta-Analysis of Cohorts and Clinical Registries**

Suwasin Udomkarnjananun, MD,<sup>1,2,3</sup> Stephen J. Kerr, PhD,<sup>4,5</sup> Natavudh Townamchai, MD,<sup>1,2,3</sup> Paweena Susantitaphong, MD, PhD,<sup>1</sup> Wasee Tulvatana, MD,<sup>6</sup> Kearkiat Praditpornsilpa, MD,<sup>1</sup> Somchai Eiam-Ong, MD,<sup>1</sup> Yingyos Avihingsanon, MD<sup>1,2,3</sup>

<sup>1</sup>Division of Nephrology, Department of Medicine, Faculty of Medicine, Chulalongkorn University and King Chulalongkorn Memorial Hospital, Bangkok, Thailand

<sup>2</sup>Renal Immunology and Transplantation Research Unit, Faculty of Medicine, Chulalongkorn University, Bangkok, Thailand

<sup>3</sup>Excellence Center for Solid Organ Transplantation, King Chulalongkorn Memorial Hospital, Bangkok, Thailand

<sup>4</sup>Research Affairs, Faculty of Medicine, Chulalongkorn University, Bangkok, Thailand

<sup>5</sup>The Kirby Institute, University of New South Wales, Sydney, NSW, Australia

<sup>6</sup>Department of Ophthalmology, Faculty of Medicine, Chulalongkorn University and King Chulalongkorn Memorial Hospital, Bangkok, Thailand

**Correspondence:** Suwasin Udomkarnjananun, Division of Nephrology, Department of Medicine, Faculty of Medicine, Chulalongkorn University, 1873 Rama IV Road, Bangkok, Thailand, 10330.

**Supplementary Table S1:** Quality assessment of the included studies using the Newcastle-Ottawa Quality Assessment Scale.

| <b>Authors</b>        | <b>Selection<br/>(From total of ●●●●)</b> | <b>Comparability<br/>(From total of ●●)</b> | <b>Outcome<br/>(From total of ●●●)</b> |
|-----------------------|-------------------------------------------|---------------------------------------------|----------------------------------------|
| Bossini et al.        | ●●●●                                      | ●●                                          | ●●                                     |
| Cravedi et al.        | ●●●●                                      | ●●                                          | ●●●                                    |
| Caillard et al.       | ●●●●                                      | ●●                                          | ●●●                                    |
| Azzi et al.           | ●●●●                                      | ●●                                          | ●●●                                    |
| Craig-Schapiro et al. | ●●●●                                      | ●●                                          | ●●●                                    |
| Hilbrands et al.      | ●●●●                                      | ●●                                          | ●●●                                    |
| Mamode et al.         | ●●●●                                      | ●●                                          | ●●                                     |
| Willicombe et al.     | ●●●●                                      | ●●                                          | ●●                                     |
| Oto et al.            | ●●●●                                      | ●●                                          | ●●●                                    |
| Kute et al.           | ●●●●                                      | ●●                                          | ●●●                                    |
| Villanego et al.      | ●●●●                                      | ●●                                          | ●●●                                    |
| Alshaqqaq et al.      | ●●●●                                      | ●●                                          | ●●                                     |
| Requiao-Moura et al.  | ●●●●                                      | ●●                                          | ●●                                     |

**Supplementary Figure S1: Forest plot of patient characteristics that were significantly associated with mortality.**

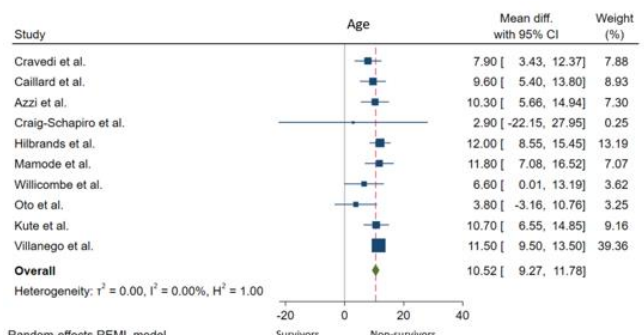

Random-effects REML model

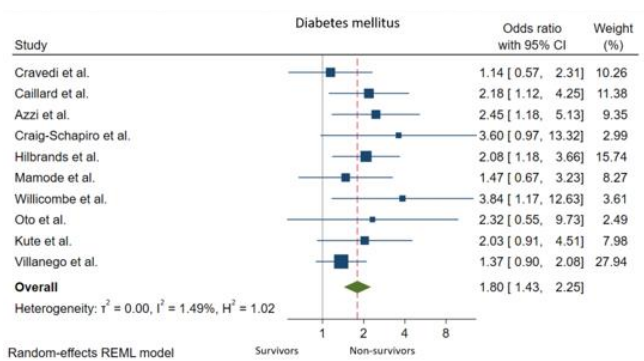

Random-effects REML model

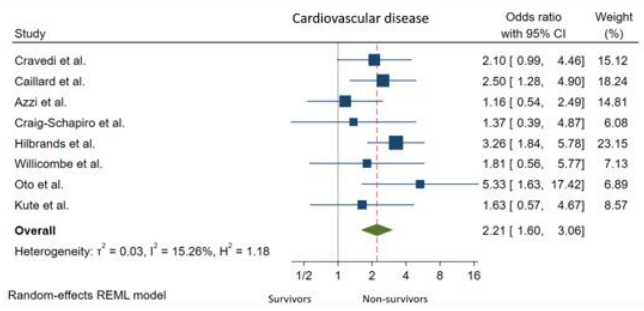

Random-effects REML model

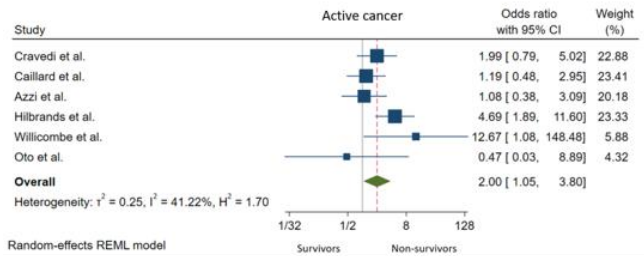

Random-effects REML model

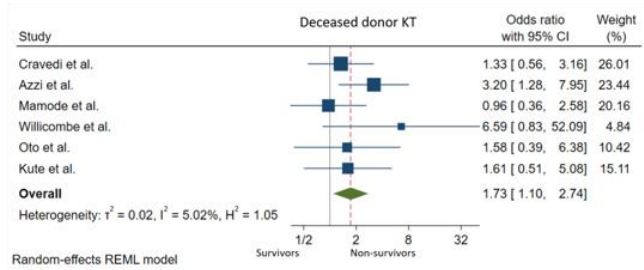

Random-effects REML model

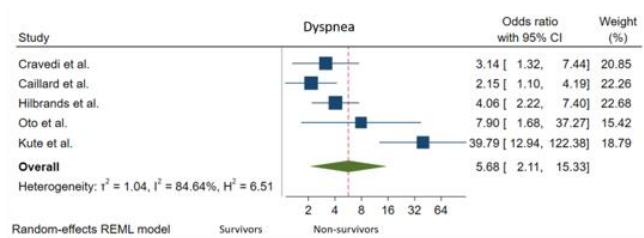

Random-effects REML model

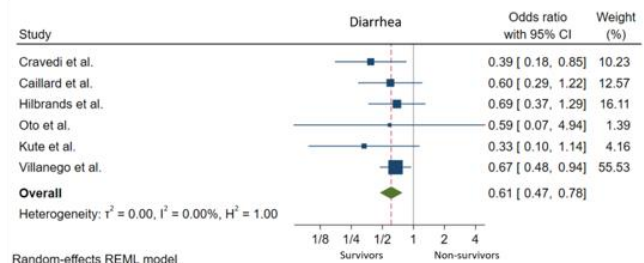

Random-effects REML model

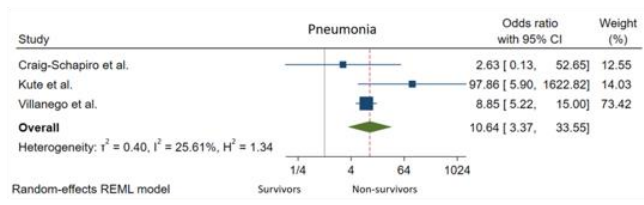

Random-effects REML model

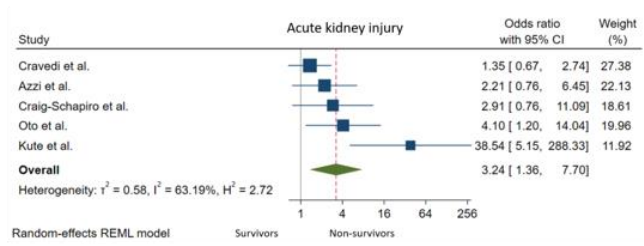

Random-effects REML model

**Supplementary Figure S2:** Forest plot of laboratory investigations that were significantly associated with mortality.

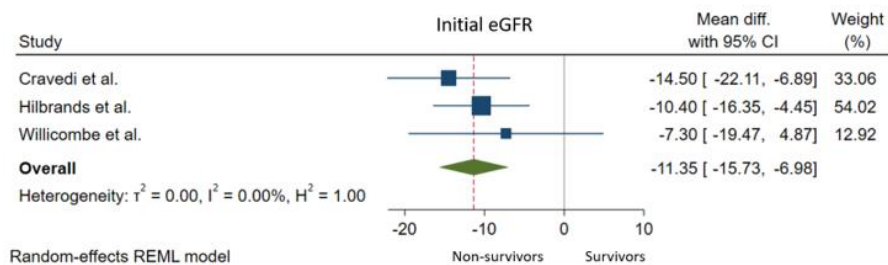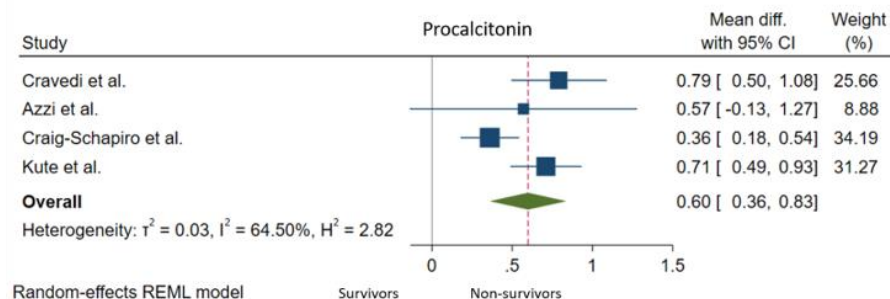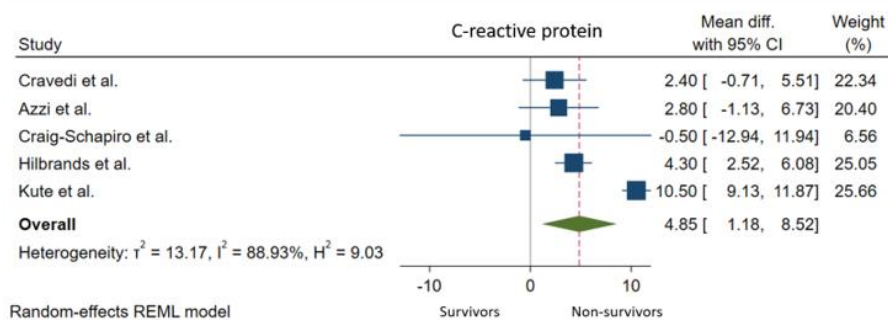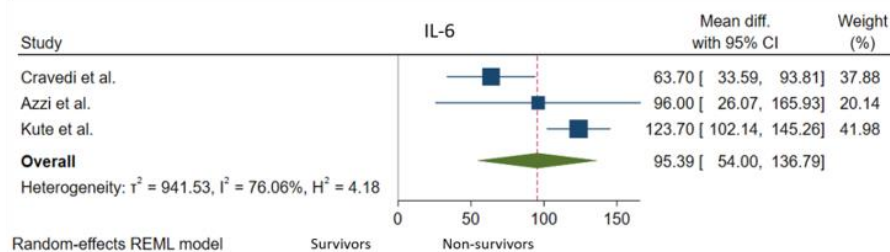

**Supplementary Figure S3: Forest plot of treatments received that were significantly associated with mortality.**

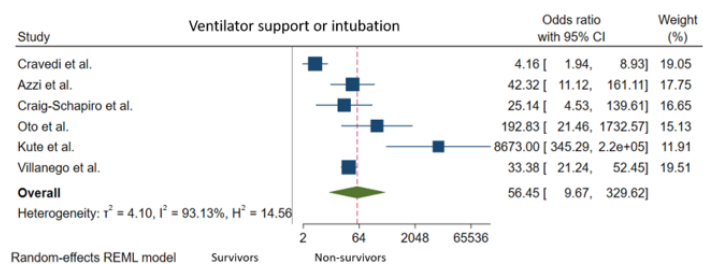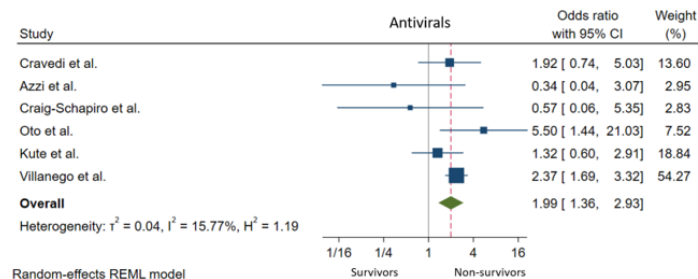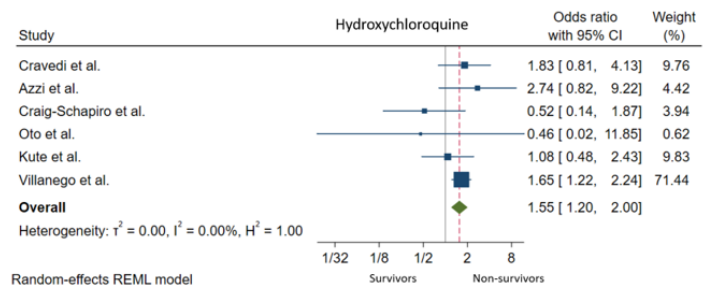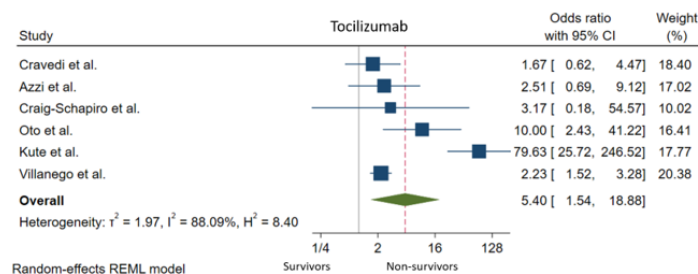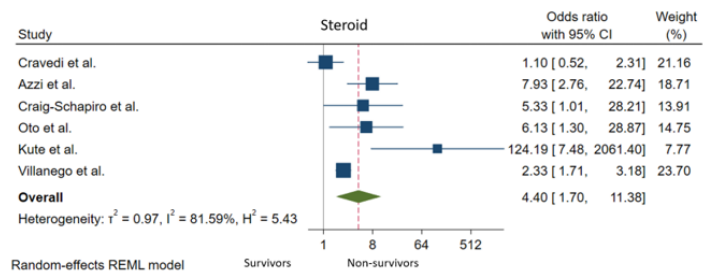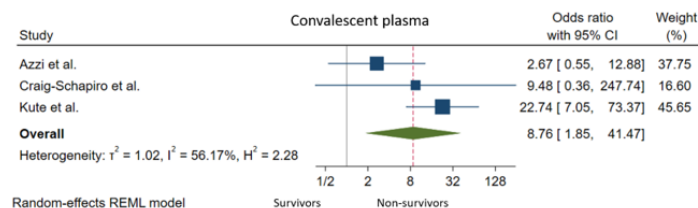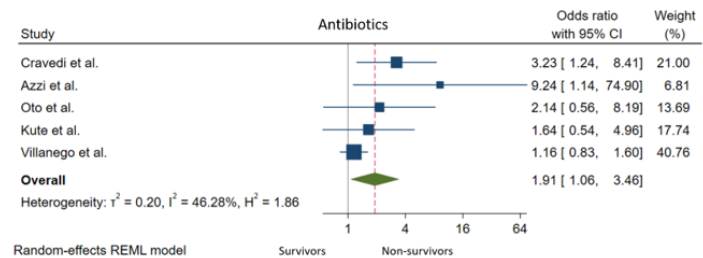

Supplement: 41598_2021_99713_MOESM1_ESM.pdf [file 41598_2021_99713_MOESM1_ESM.pdf]
